# Supplementary material
Source: MDPI journal article supplement (https://www.mdpi.com/2304-6767/8/4/122)
Supplement: s1 [file s1]

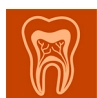

# Supplementary Materials: Effectiveness of a Novel Dentifrice Containing Stabilized Chlorine Dioxide, Sarkosyl, and Sodium Fluoride

Srinivas Rao Mynenivenkatasatya \*, Howard Wang, William Cooley, Esmeralda Garcia-Smith, Jaiprakash Shewale and James Ratcliff

Table S1. Ingredients of tested commercial toothpastes.

| Ingredient                            | ClōSYS Anticavity |                | Crest 3D White Mild Mint*** | Colgate Total Advanced Whitening**** |
|---------------------------------------|-------------------|----------------|-----------------------------|--------------------------------------|
|                                       | Toothpaste B*     | Toothpaste C** |                             |                                      |
| Sodium Fluoride                       | 0.24%             | 0.24%          | 0.243%                      | 0.24%                                |
| Triclosan                             | ---               | ---            | ---                         | 0.30%                                |
| Stabilized Chlorine Dioxide           | +++               | +++            | ---                         | ---                                  |
| Peppermint oil blend                  | +++               | +++            | ---                         | ---                                  |
| Menthol crystals                      | +++               | +++            | ---                         | ---                                  |
| Sucralose                             | +++               | +++            | ---                         | ---                                  |
| Disodium hydrogen phosphate           | +++               | +++            | +++                         | ---                                  |
| Sodium dihydrogen phosphate           | +++               | +++            | ---                         | ---                                  |
| Cellulose gum                         | +++               | +++            | ---                         | +++                                  |
| Titanium dioxide                      | +++               | +++            | +++                         | +++                                  |
| Hydrated silica                       | +++               | +++            | +++                         | +++                                  |
| Sodium lauroyl sarcosinate (sarkosyl) | +++               | +++            | ---                         | ---                                  |
| Sorbitol                              | +++               | ---            | +++                         | +++                                  |
| Flavor (proprietary)                  | ---               | ---            | +++                         | +++                                  |
| Sodium Hydroxide                      | ---               | ---            | +++                         | +++                                  |
| Sodium Lauryl Sulfate                 | ---               | ---            | +++                         | +++                                  |
| Alcohol                               | ---               | ---            | 0.7%                        | ---                                  |
| Xanthan Gum                           | ---               | ---            | +++                         | ---                                  |
| Sodium Saccharin                      | ---               | ---            | +++                         | +++                                  |
| Poloxamer 407                         | ---               | ---            | +++                         | ---                                  |
| Glycerin                              | ---               | ---            | +++                         | +++                                  |
| Carbomer                              | ---               | ---            | +++                         | ---                                  |
| Polysorbate 80                        | ---               | ---            | +++                         | ---                                  |
| Sodium Benzoate                       | ---               | ---            | +++                         | ---                                  |
| Cetylpyridinium Chloride              | ---               | ---            | +++                         | ---                                  |
| Benzoic Acid                          | ---               | ---            | +++                         | ---                                  |
| Copernicia Cerifera (Carnauba) Wax    | ---               | ---            | +++                         | ---                                  |
| Blue 1                                | ---               | ---            | +++                         | ---                                  |
| Yellow 5                              | ---               | ---            | +++                         | ---                                  |
| PVM/MA copolymer                      | ---               | ---            | ---                         | +++                                  |
| Propylene glycol                      | ---               | ---            | ---                         | +++                                  |
| Carrageenan                           | ---               | ---            | ---                         | +++                                  |
| Water                                 | +++               | +++            | +++                         | +++                                  |

\* US Patent Application Number 13/131,506.

\*\*US Patent Application No. 16/133,359.

\*\*\*<https://www.heb.com/product-detail/crest-3d-white-whitening-toothpaste-mild-mint/2096274>; accessed on October 12, 2020.

\*\*\*\*<https://dailymed.nlm.nih.gov/dailymed/drugInfo.cfm?setid=219a0e97-f89b-4cde-9965-3d25b6896573##>; accessed on October 12, 2020.
